# Supplementary material
Source: Springer Nature journal article supplement (https://www.springermedizin.de/resource/supplementary/13012_2013_692_MOESM4_ESM.pdf/9630254)

Defining  
synthesis question

Search for and  
selection of Guidelines

Extraction of recommendations

Independent extraction  
from sub-sample

Synthesis of recommendations  
by programme aims,  
proximal objectives and strategies

Validation of inferred  
programme objectives

Final formulation of synthesis

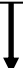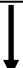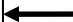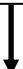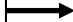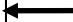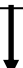

Supplement: MOESM4 [file 9630254]
